# Supplementary material for: Thienopyrimidine scaffolds as promising antimicrobial agents: synthesis, biological evaluation, DFT analysis and molecular docking
Source: Royal Society of Chemistry journal article supplement (doi:10.1039/d5ra09678b), 2026-01-01
Supplement: d5ra09678b1.pdf [file d5ra09678b1.pdf]

**Supporting Information for**

**Thienopyrimidine Scaffolds as Promising Antimicrobial Agents: Synthesis, Biological  
Evaluation, DFT Analysis, and Molecular Docking**

Mostafa Sayed<sup>1#</sup>, Menna A. Naguib<sup>1#</sup>, Ahmed A.K. Mohammed<sup>2</sup>, Reda Hassanien<sup>1</sup>,  
Mahmoud S. Tolba<sup>1\*</sup>, Mostafa Ahmed<sup>1\*</sup>

<sup>1</sup>Chemistry Department, Faculty of Science, New Valley University, El-Kharja 72511, Egypt

<sup>2</sup>Chemistry Department, Faculty of Science, Assiut University, Assiut 71516 , Egypt

#Theses authors contributed equally to this work.

Corresponding authors: Mahmoud S. Tolba ([Mahmoud.Tolba@sci.nvu.edu.eg](mailto:Mahmoud.Tolba@sci.nvu.edu.eg)) and Mostafa Ahmed ([drmostafa@scinv.au.edu.eg](mailto:drmostafa@scinv.au.edu.eg))

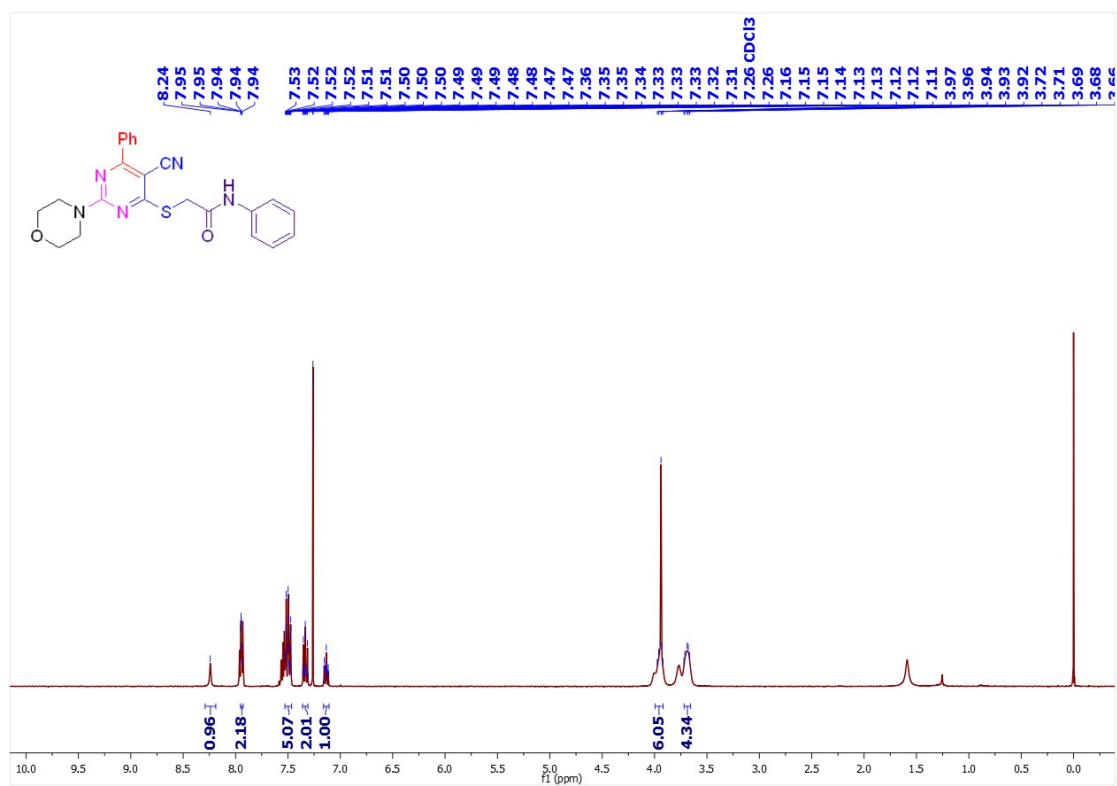

Figure S1. <sup>1</sup>H NMR Spectrum of Compound 9.

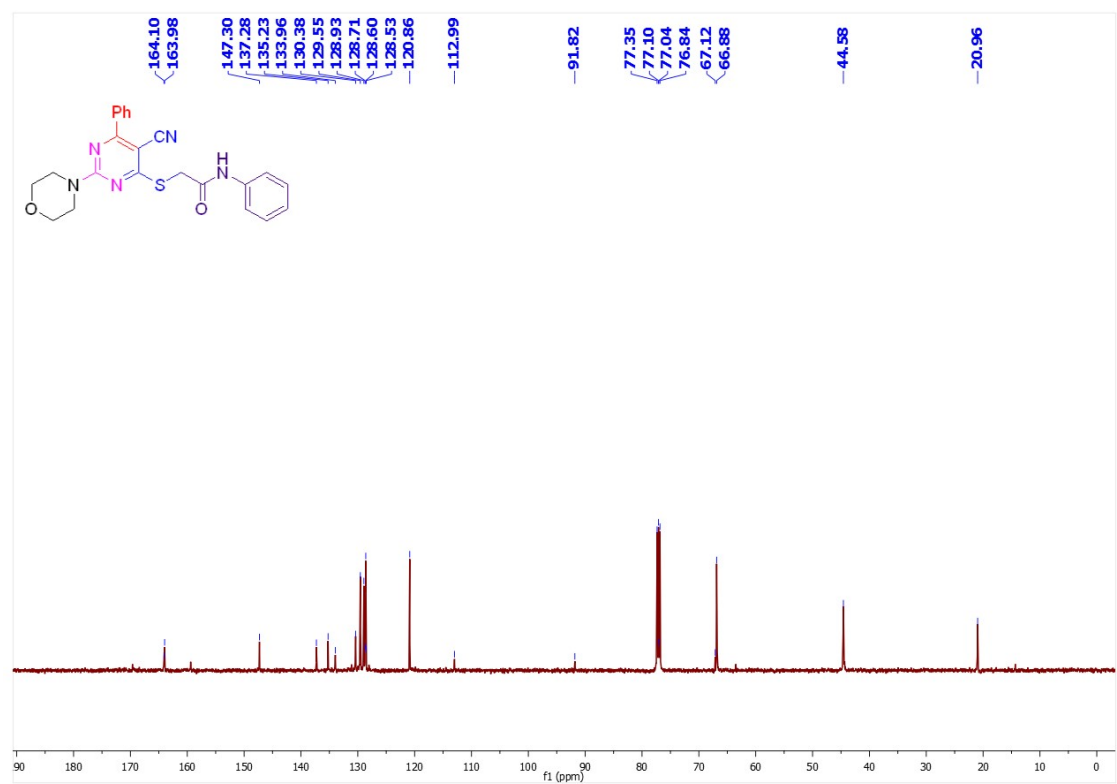

Figure S2. <sup>13</sup>C NMR Spectrum of Compound 9.

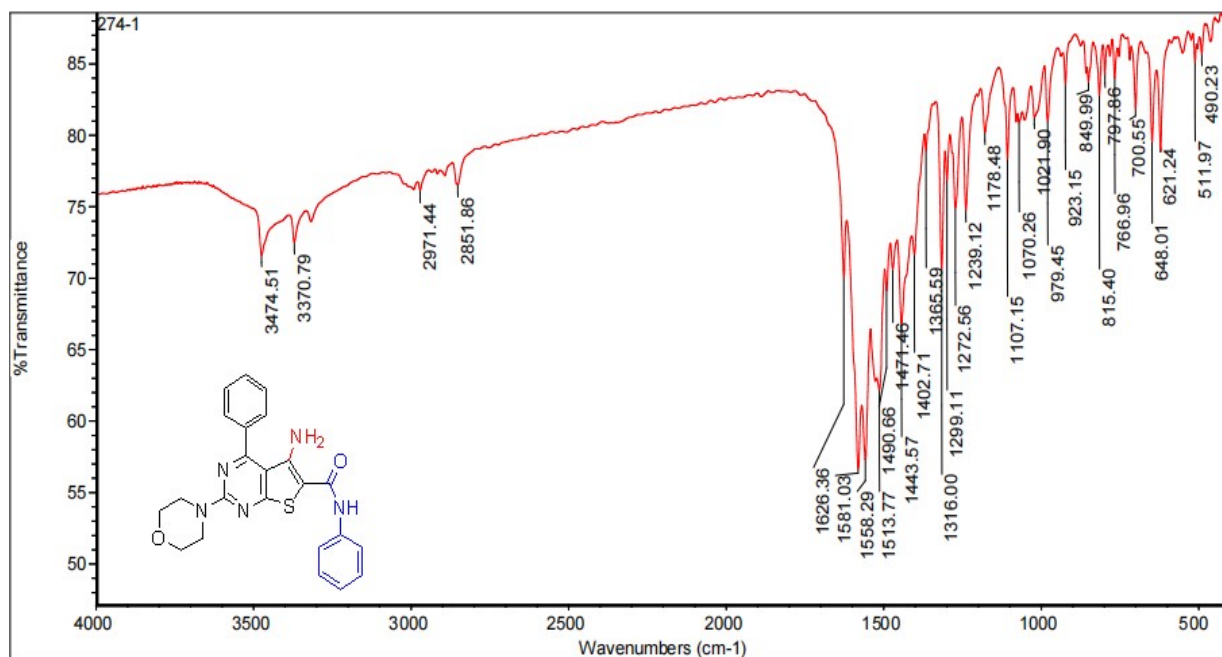

**Figure S3.** FTIR Spectrum of Compound 10.

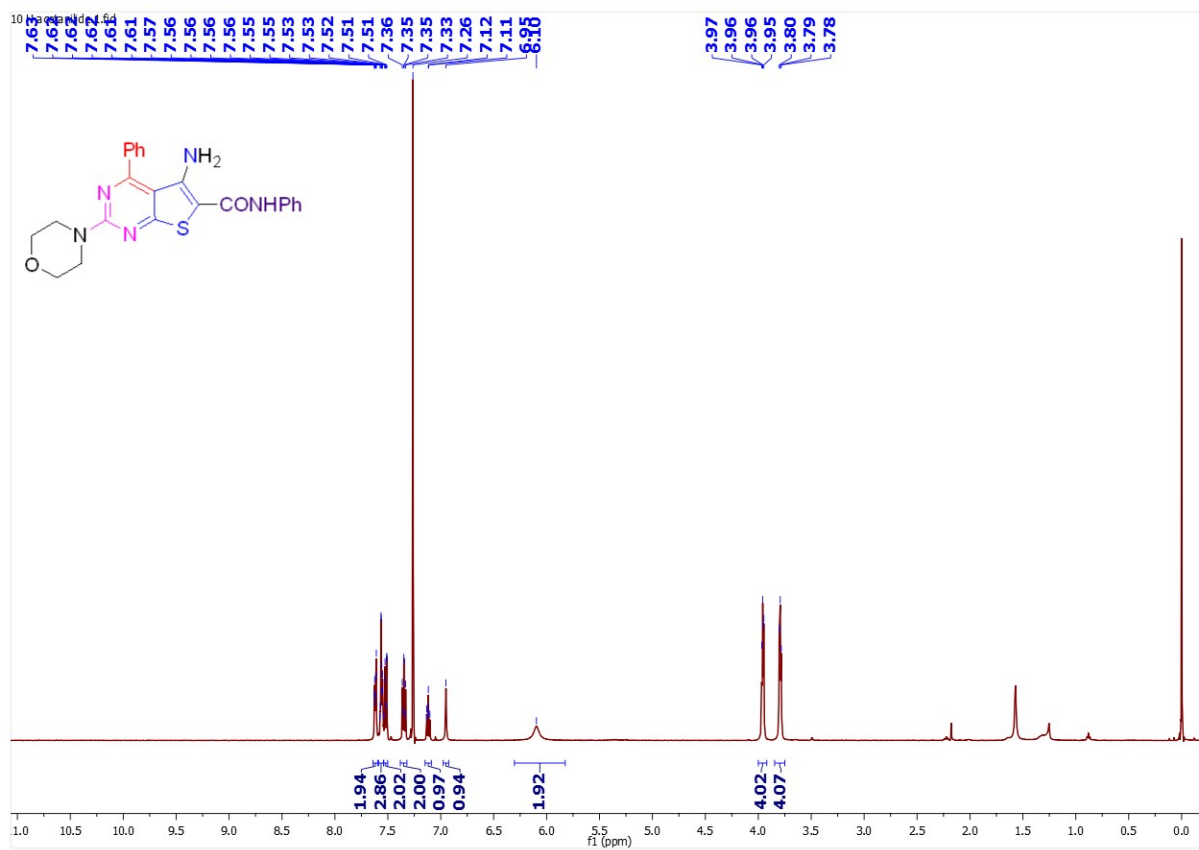

**Figure S4.**  $^1\text{H}$  NMR Spectrum of Compound 10.

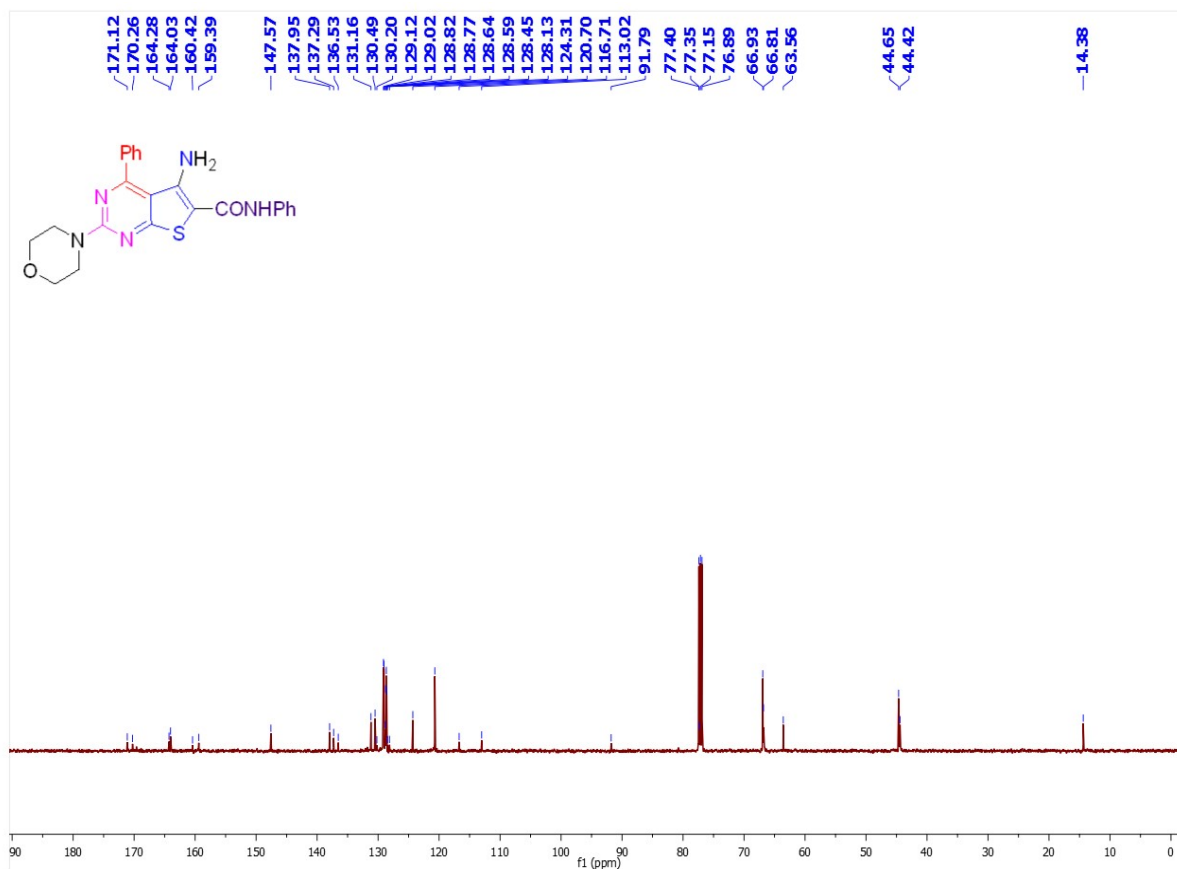

Figure S5. <sup>13</sup>C NMR Spectrum of Compound 10.

Sample-8 #6307 RT: 21.48 AV: 1 NL: 1.13E3  
T: + c EI Full ms [30.00-650.00]

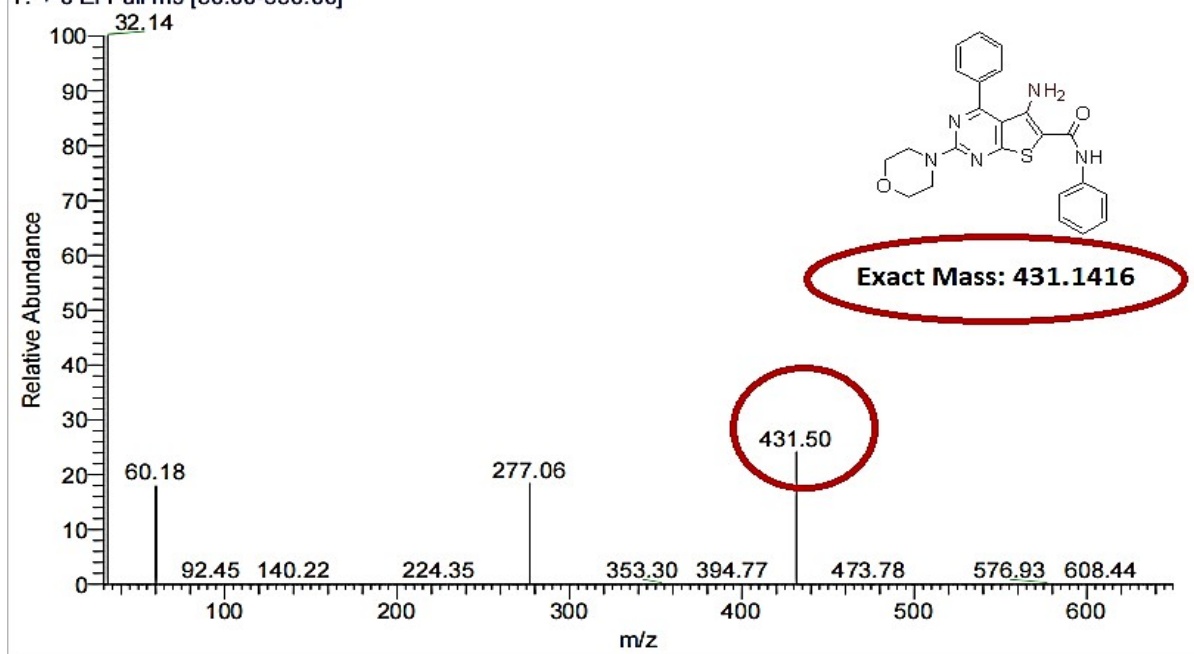

Figure S6. Mass Spectrum of Compound 10.

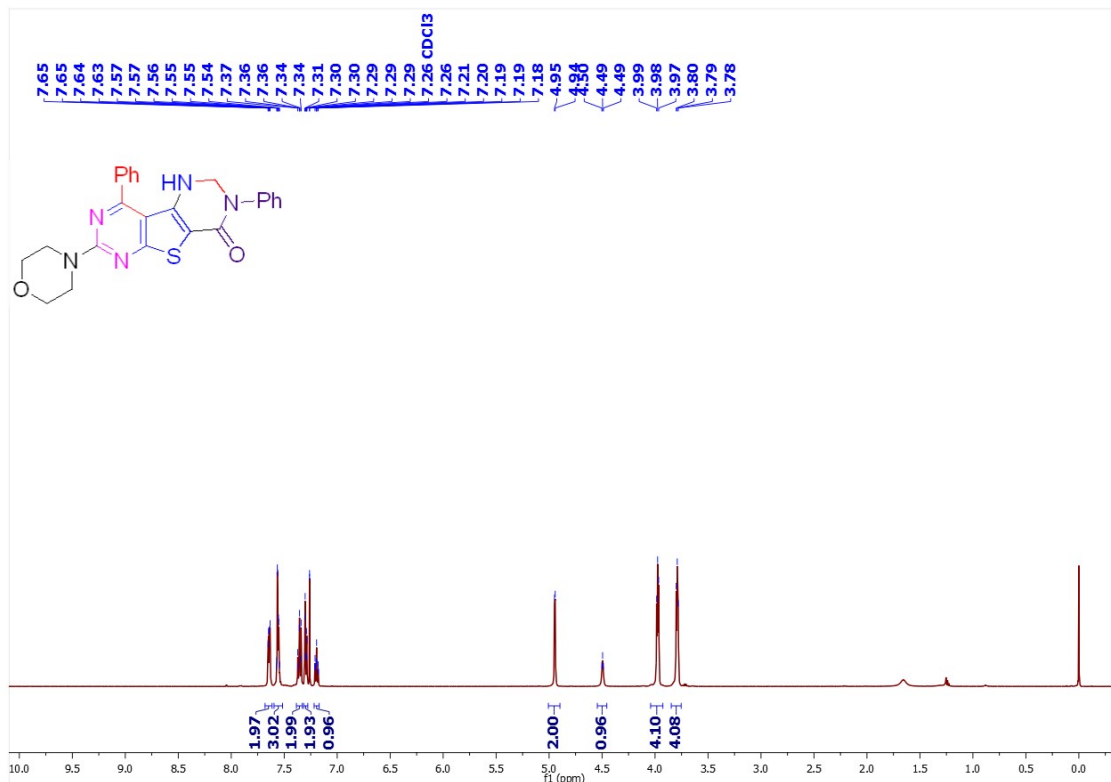

Figure S7. <sup>1</sup>H NMR Spectrum of Compound 11.

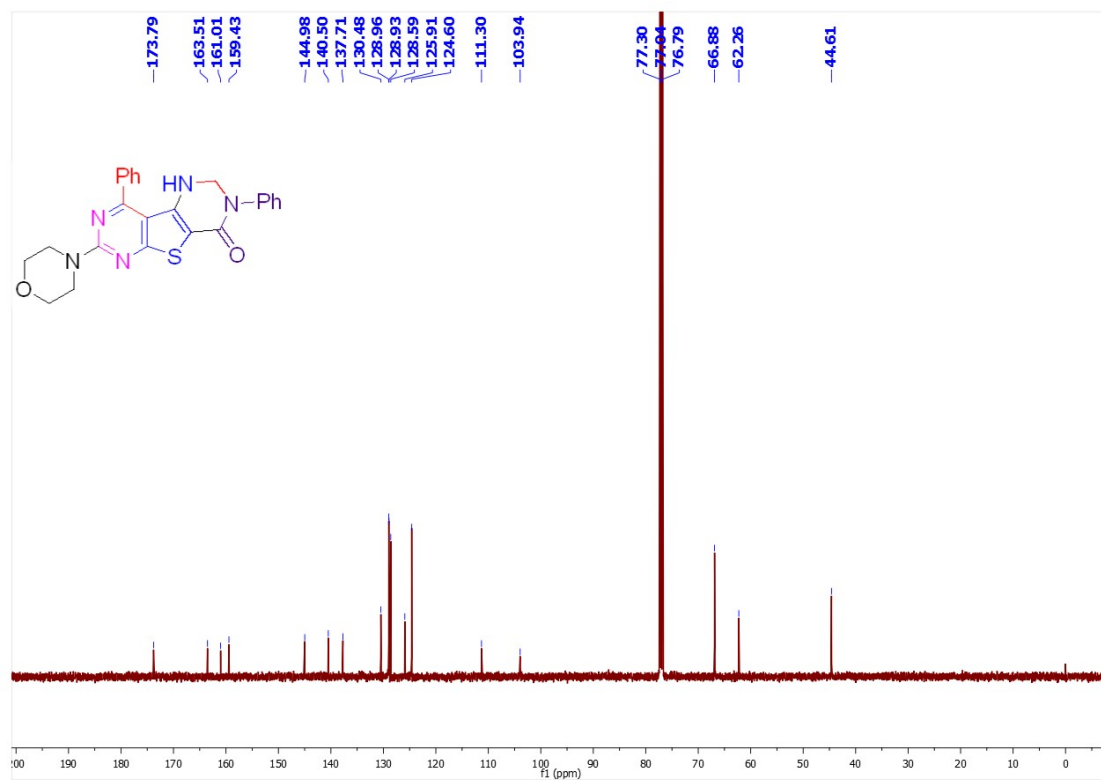

Figure S8. <sup>13</sup>C NMR Spectrum of Compound 11.

Sample-11 #8310 RT: 28.29 AV: 1 NL: 8.77E3  
T: + c EI Full ms [30.00-650.00]

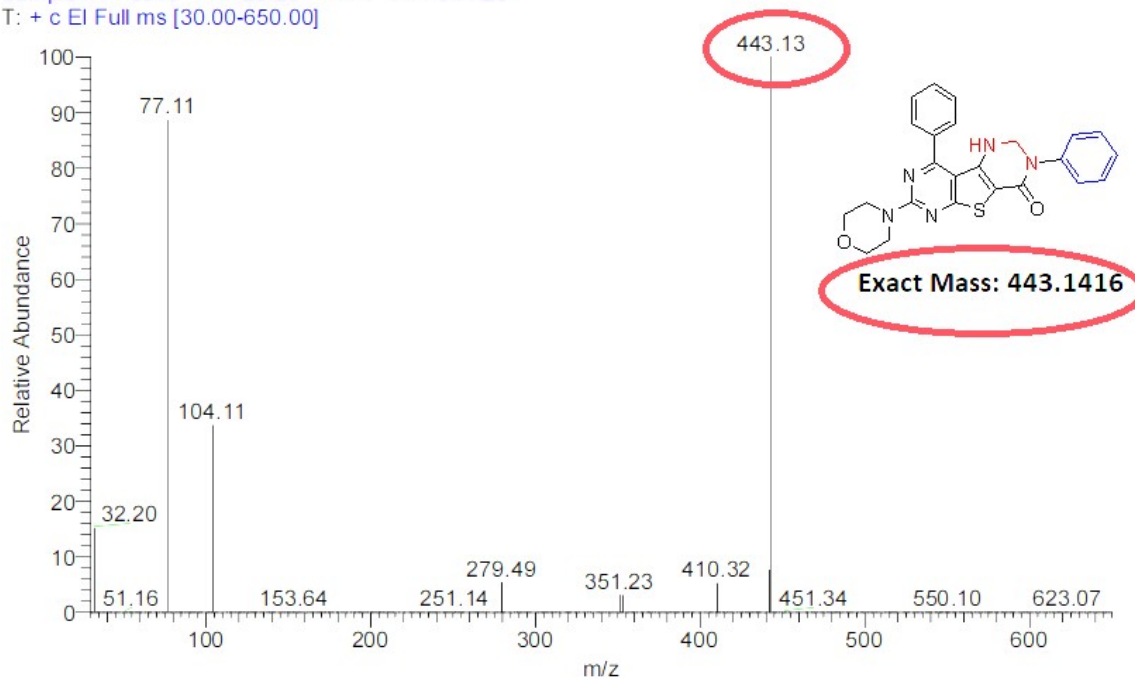

Figure S9. Mass Spectrum of Compound 11.

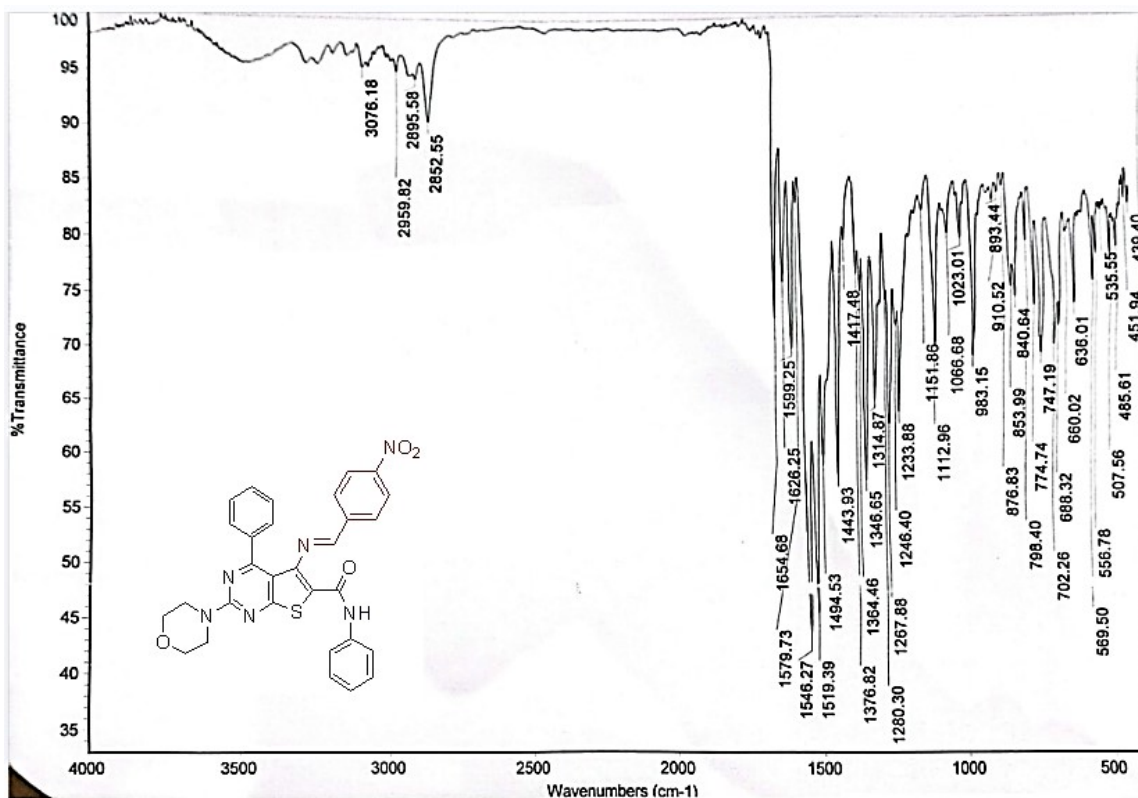

Figure S10. FTIR Spectrum of Compound 12.

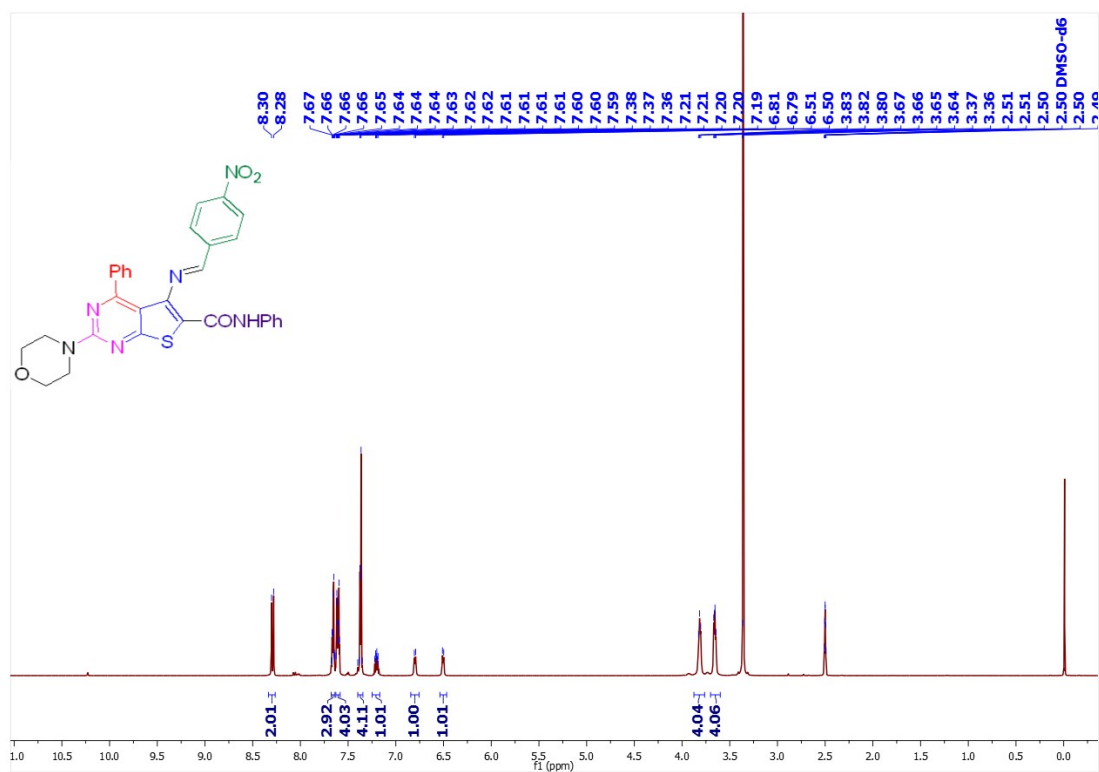

**Figure S11.** <sup>1</sup>H NMR Spectrum of Compound 12.

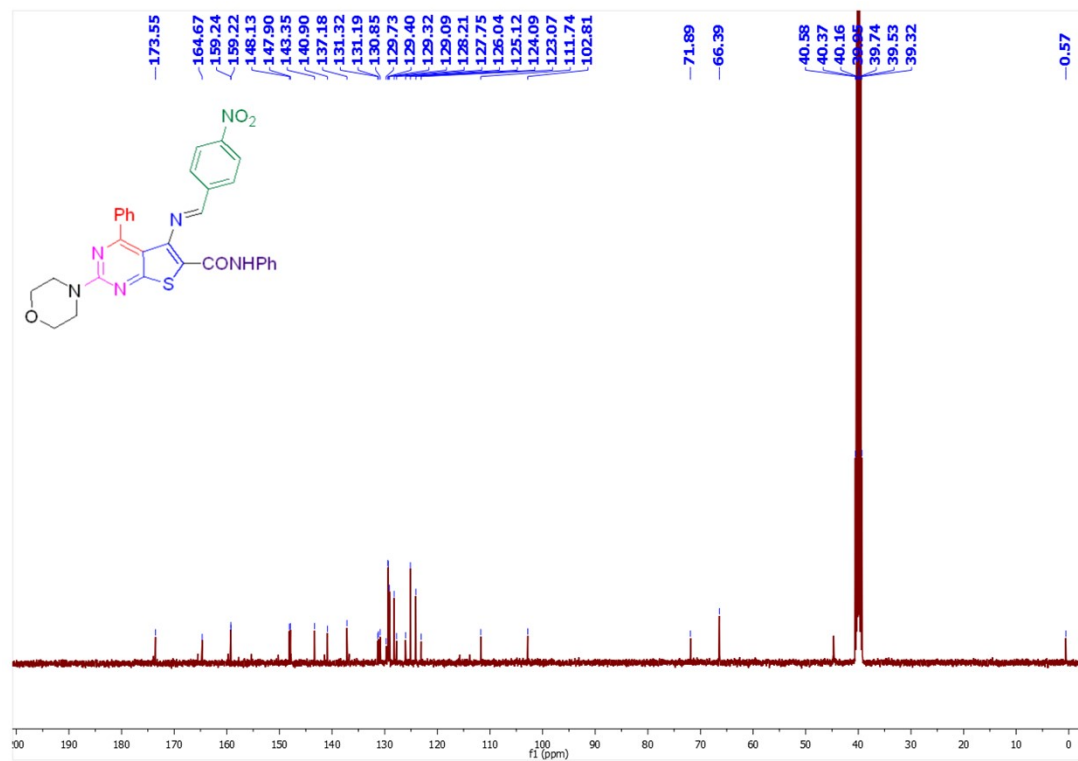

**Figure S12.** <sup>13</sup>C NMR Spectrum of Compound 12.



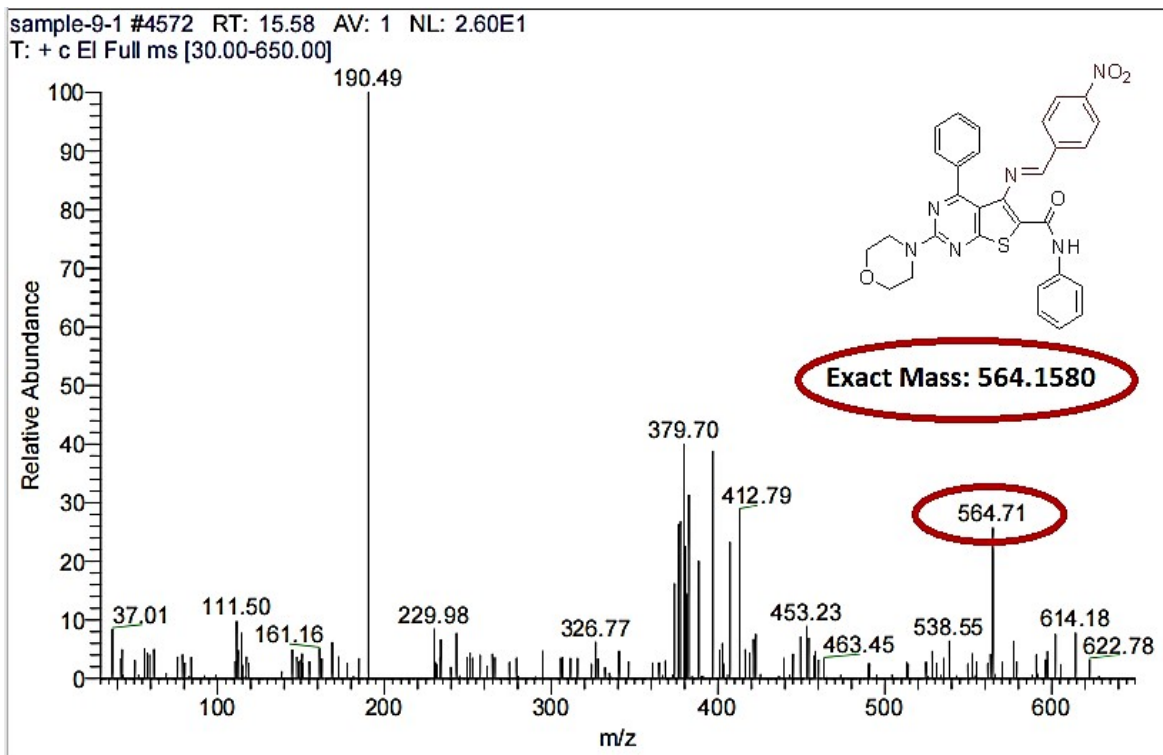

Figure S13. Mass Spectrum of Compound 12.

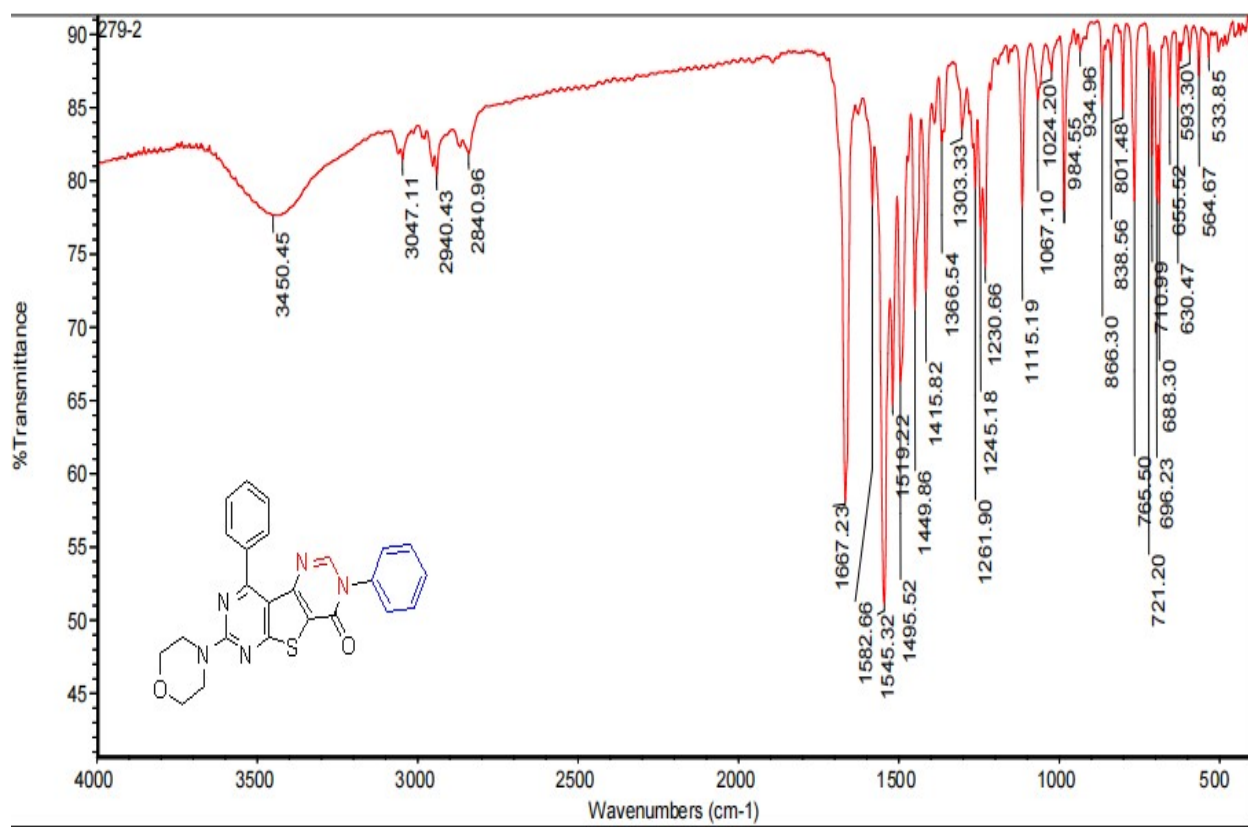

Figure S14. FTIR Spectrum of Compound 13.



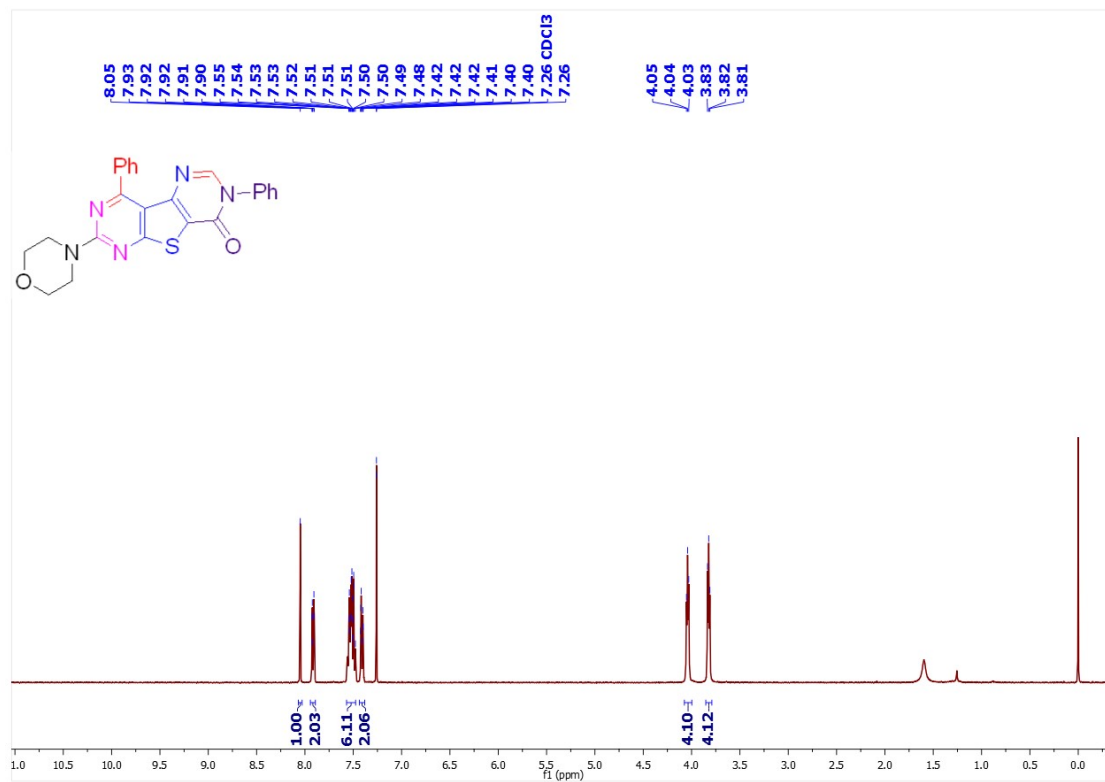

**Figure S15.** <sup>1</sup>H NMR Spectrum of Compound 13

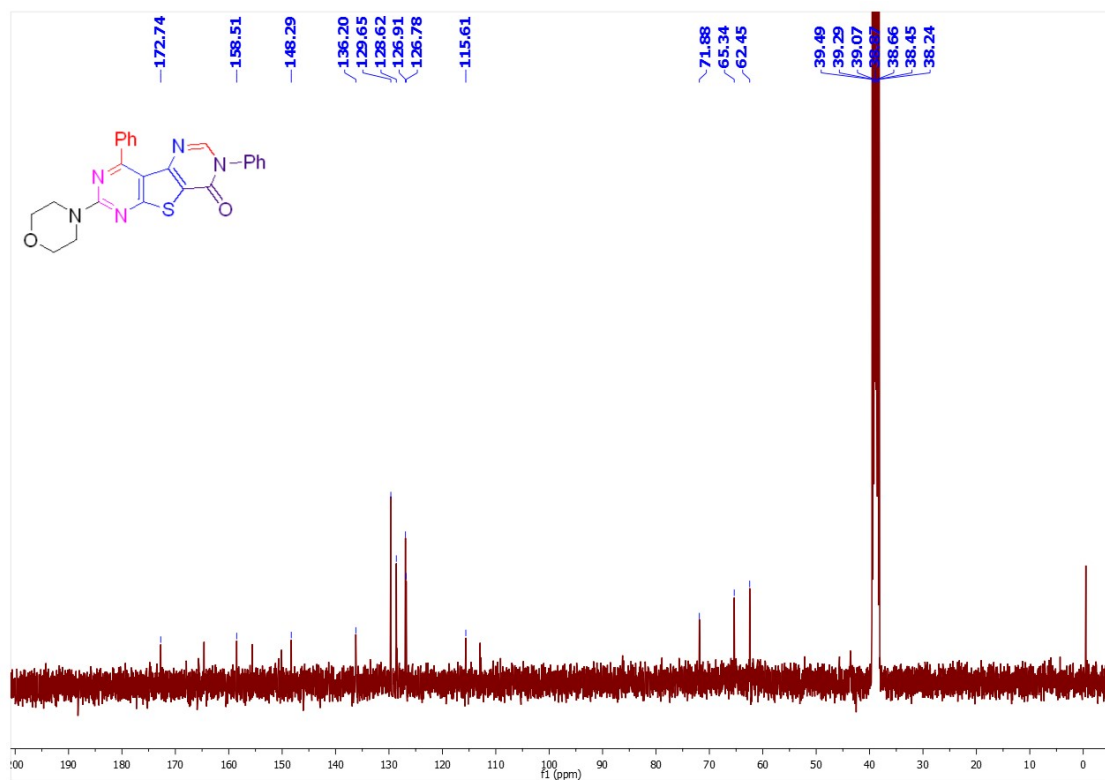

**Figure S16.** <sup>13</sup>C NMR Spectrum of Compound 13.

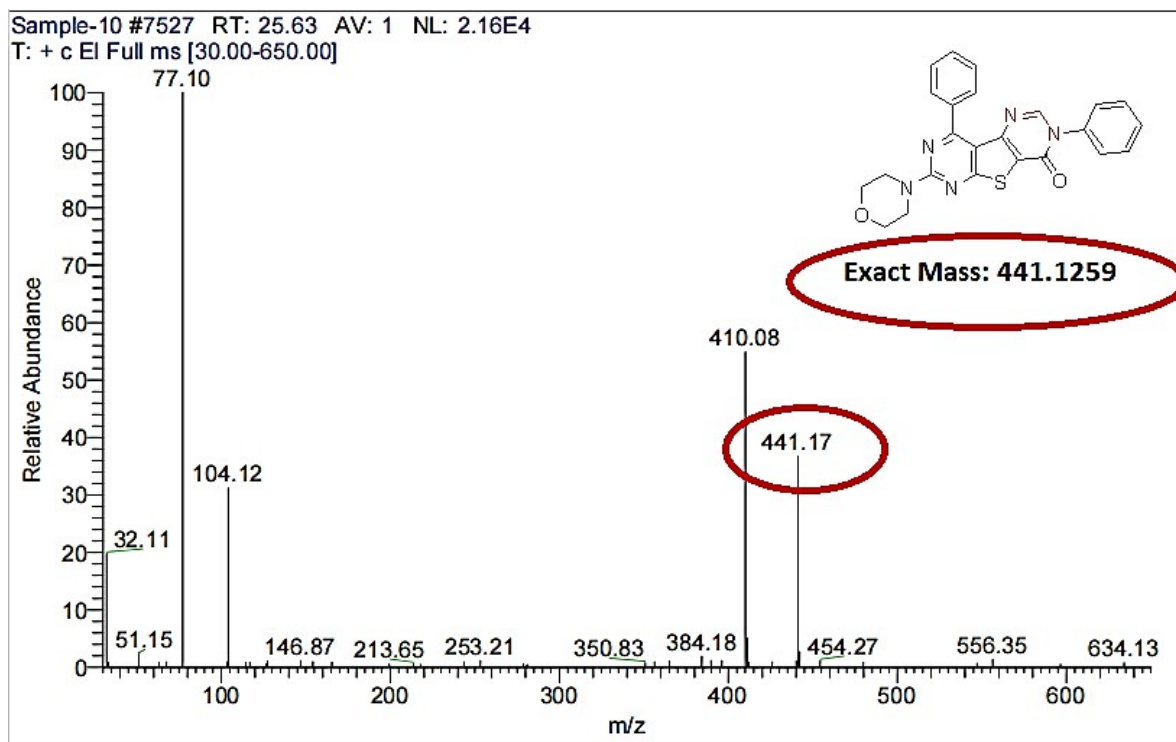

Figure S17. Mass Spectrum of Compound 13.

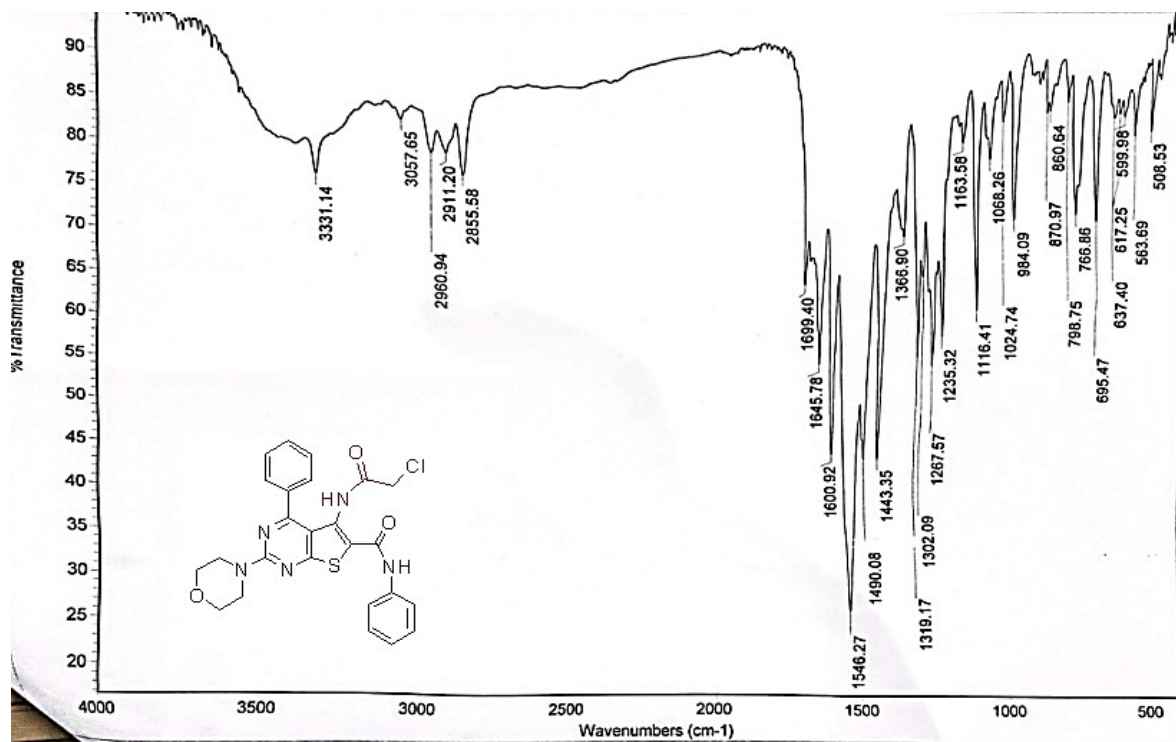

Figure S18. FTIR Spectrum of Compound 14.

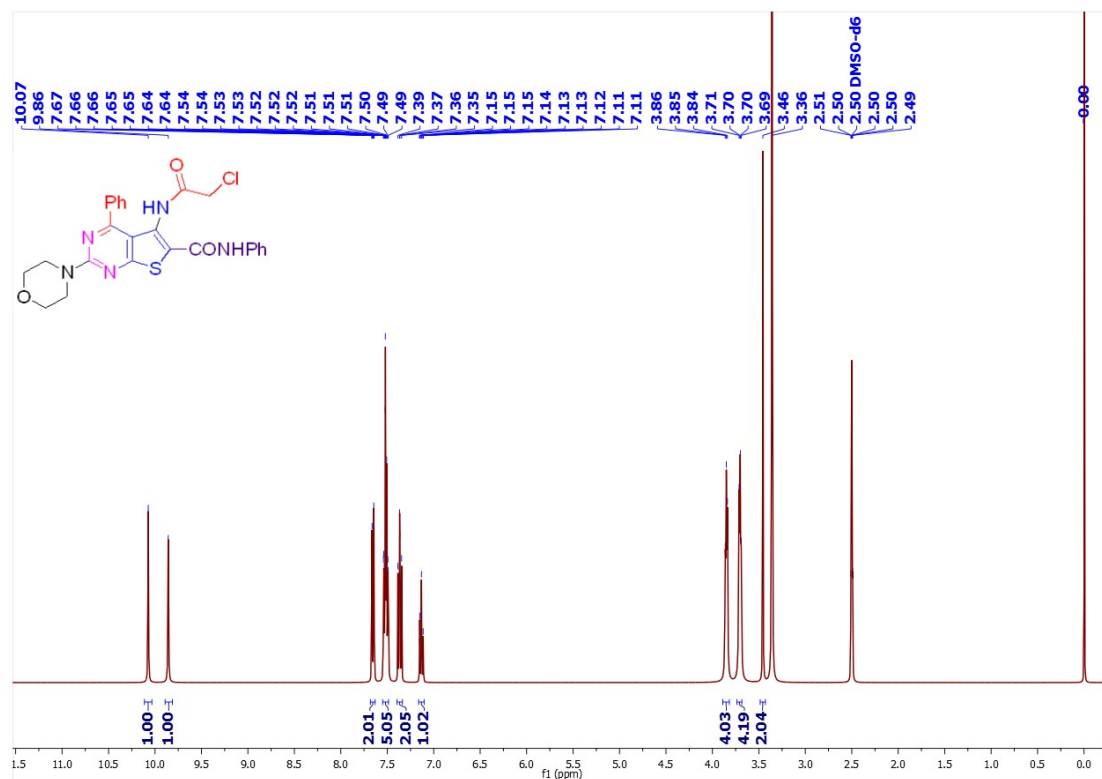

**Figure S19.** <sup>1</sup>H NMR Spectrum of Compound 14.

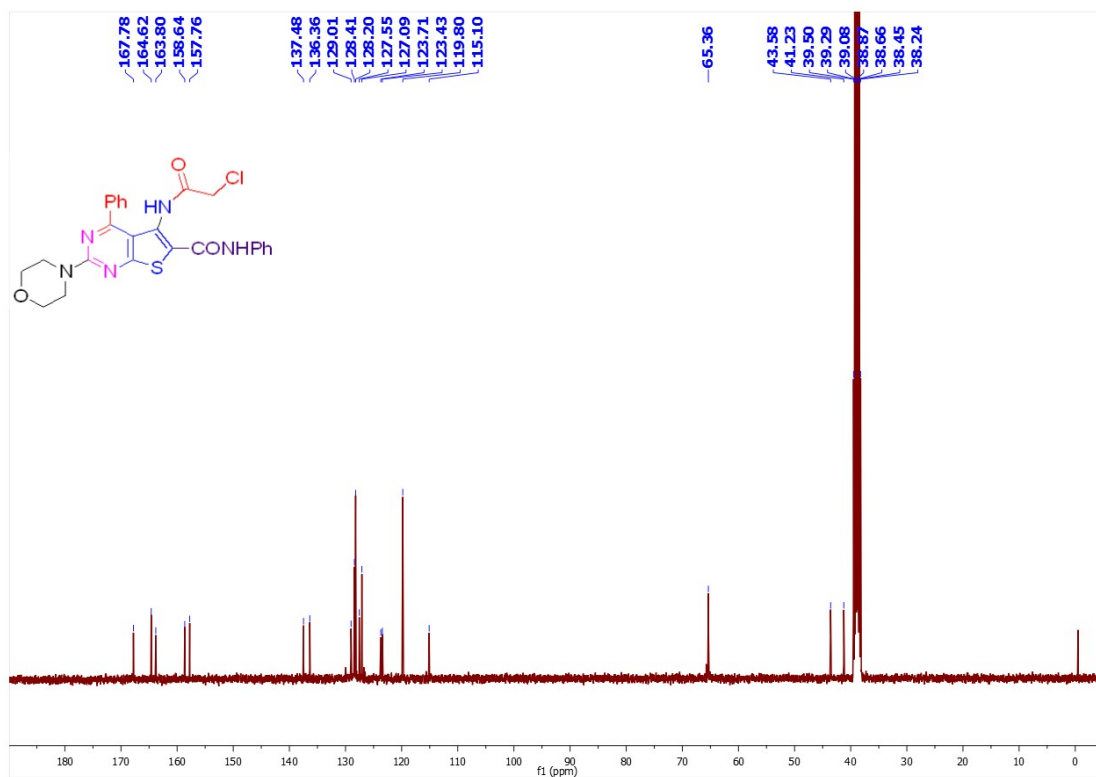

**Figure S20.** <sup>13</sup>C NMR Spectrum of Compound 14.

Sample-12 #10638 RT: 36.21 AV: 1 NL: 2.73E2  
T: + c EI Full ms [30.00-650.00]

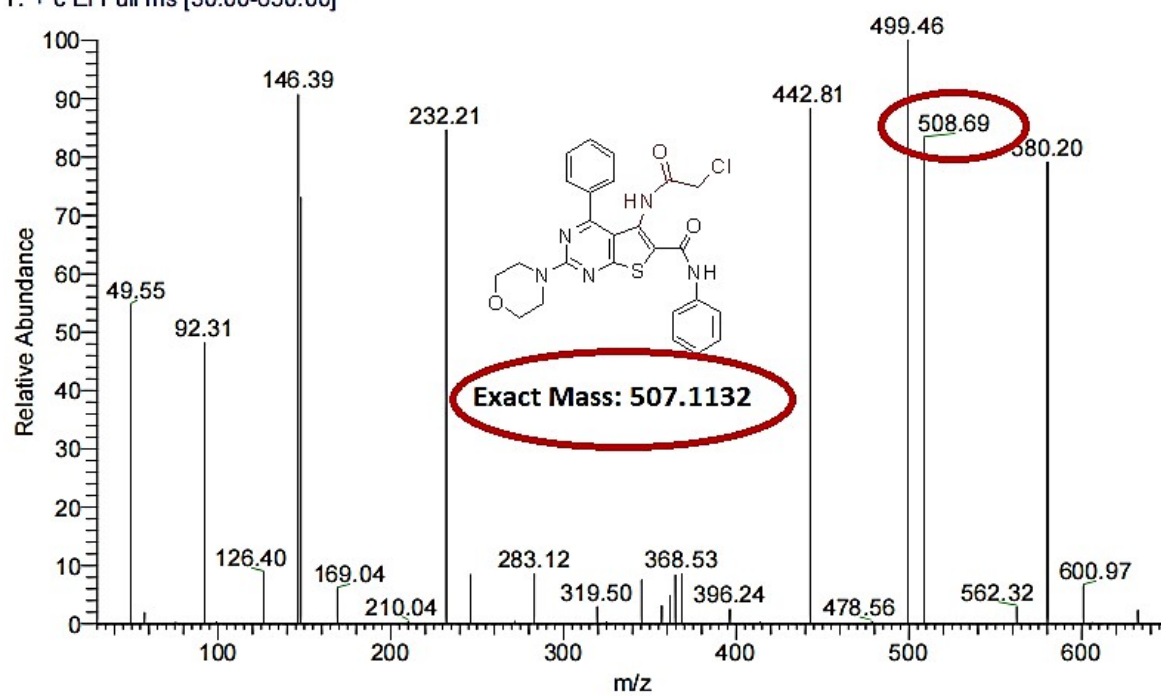

**Figure S21.** Mass Spectrum of Compound 14.
